# Supplementary material
Source: ML conference proceedings conference paper supplement (https://openaccess.thecvf.com/content/CVPR2022/html/Li_Style-Structure_Disentangled_Features_CVPR_2022_paper.html)
Supplement: Supplementary file 1 [file Li_Style-Structure_Disentangled_Features_CVPR_2022_supplemental.zip]

| Sketch                                                                              | Style                                                                                              | Samples                                                                             |                                                                                     |                                                                                     | Sketch                                                                              | Style                                                                                              | Samples                                                                               |                                                                                       |                                                                                       |
|-------------------------------------------------------------------------------------|----------------------------------------------------------------------------------------------------|-------------------------------------------------------------------------------------|-------------------------------------------------------------------------------------|-------------------------------------------------------------------------------------|-------------------------------------------------------------------------------------|----------------------------------------------------------------------------------------------------|---------------------------------------------------------------------------------------|---------------------------------------------------------------------------------------|---------------------------------------------------------------------------------------|
|    | Sensible<br>      |    |    |    |    | Fun<br>          |    |    |    |
|    | Authoritative<br> |    |    |    |    | Rational<br>     |    |    |    |
|    | Luscious<br>      |    |    |    |    | Solid<br>        |    |    |    |
|    | Mellow<br>        |    |    |    |    | Unadorned<br>    |    |    |    |
|    | Traditional<br>   |    |    |    |    | Soft<br>         |    |    |    |
|   | Vivid<br>        |   |   |   |   | Advanced<br>    |   |   |   |
|  | Technical<br>   |  |  |  |  | Naive<br>      |  |  |  |
|  | Bold<br>        |  |  |  |  | Cool<br>       |  |  |  |
|  | Formal<br>      |  |  |  |  | Dressy<br>     |  |  |  |
|  | Relaxed<br>     |  |  |  |  | Mysterious<br> |  |  |  |
|  | Wild<br>        |  |  |  |  | Calm<br>       |  |  |  |

Figure 1. Our system generates flat-color icons based on the given sketch image and the colorization style. The resolution of these icons is  $128 \times 128$ . Note that the results are diverse under the condition of an identical style label.

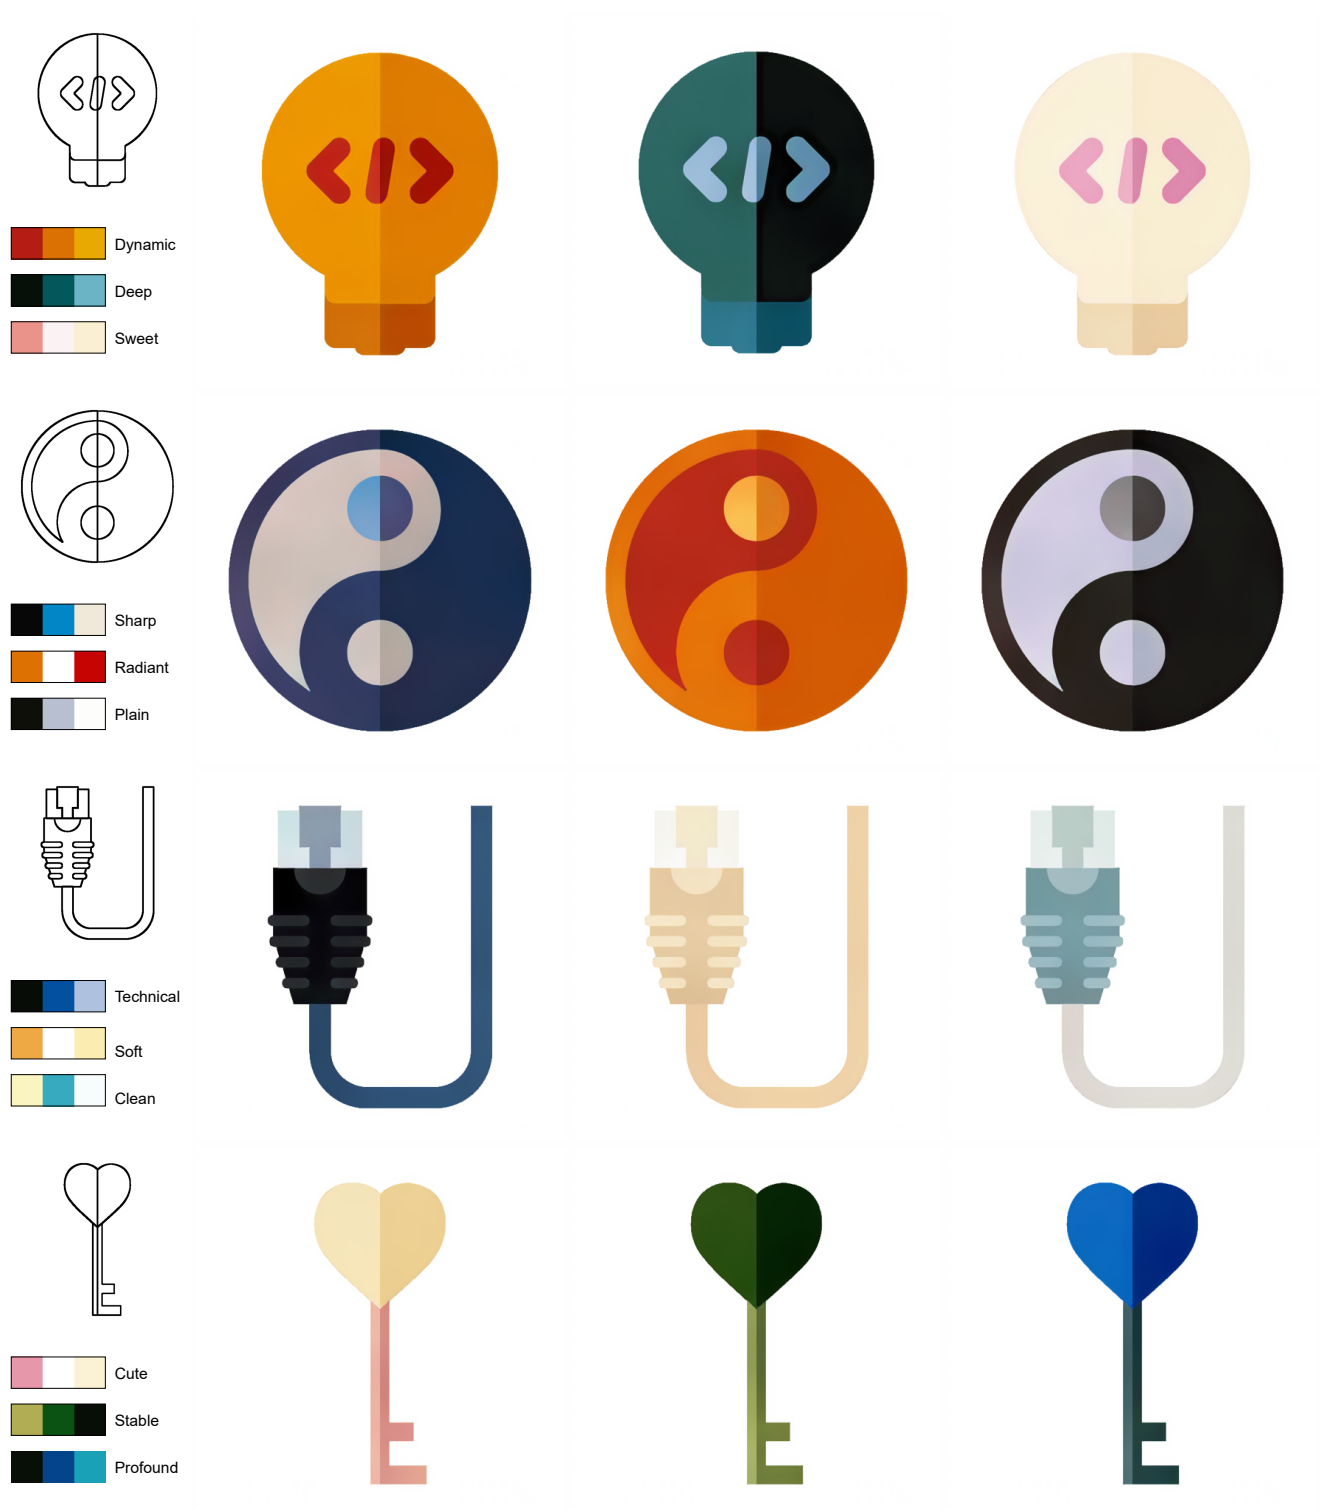

Figure 2. Our system can generates high-resolution flat-color icons based on the given sketch image and the colorization style. The resolution of these icons is  $512 \times 512$ .

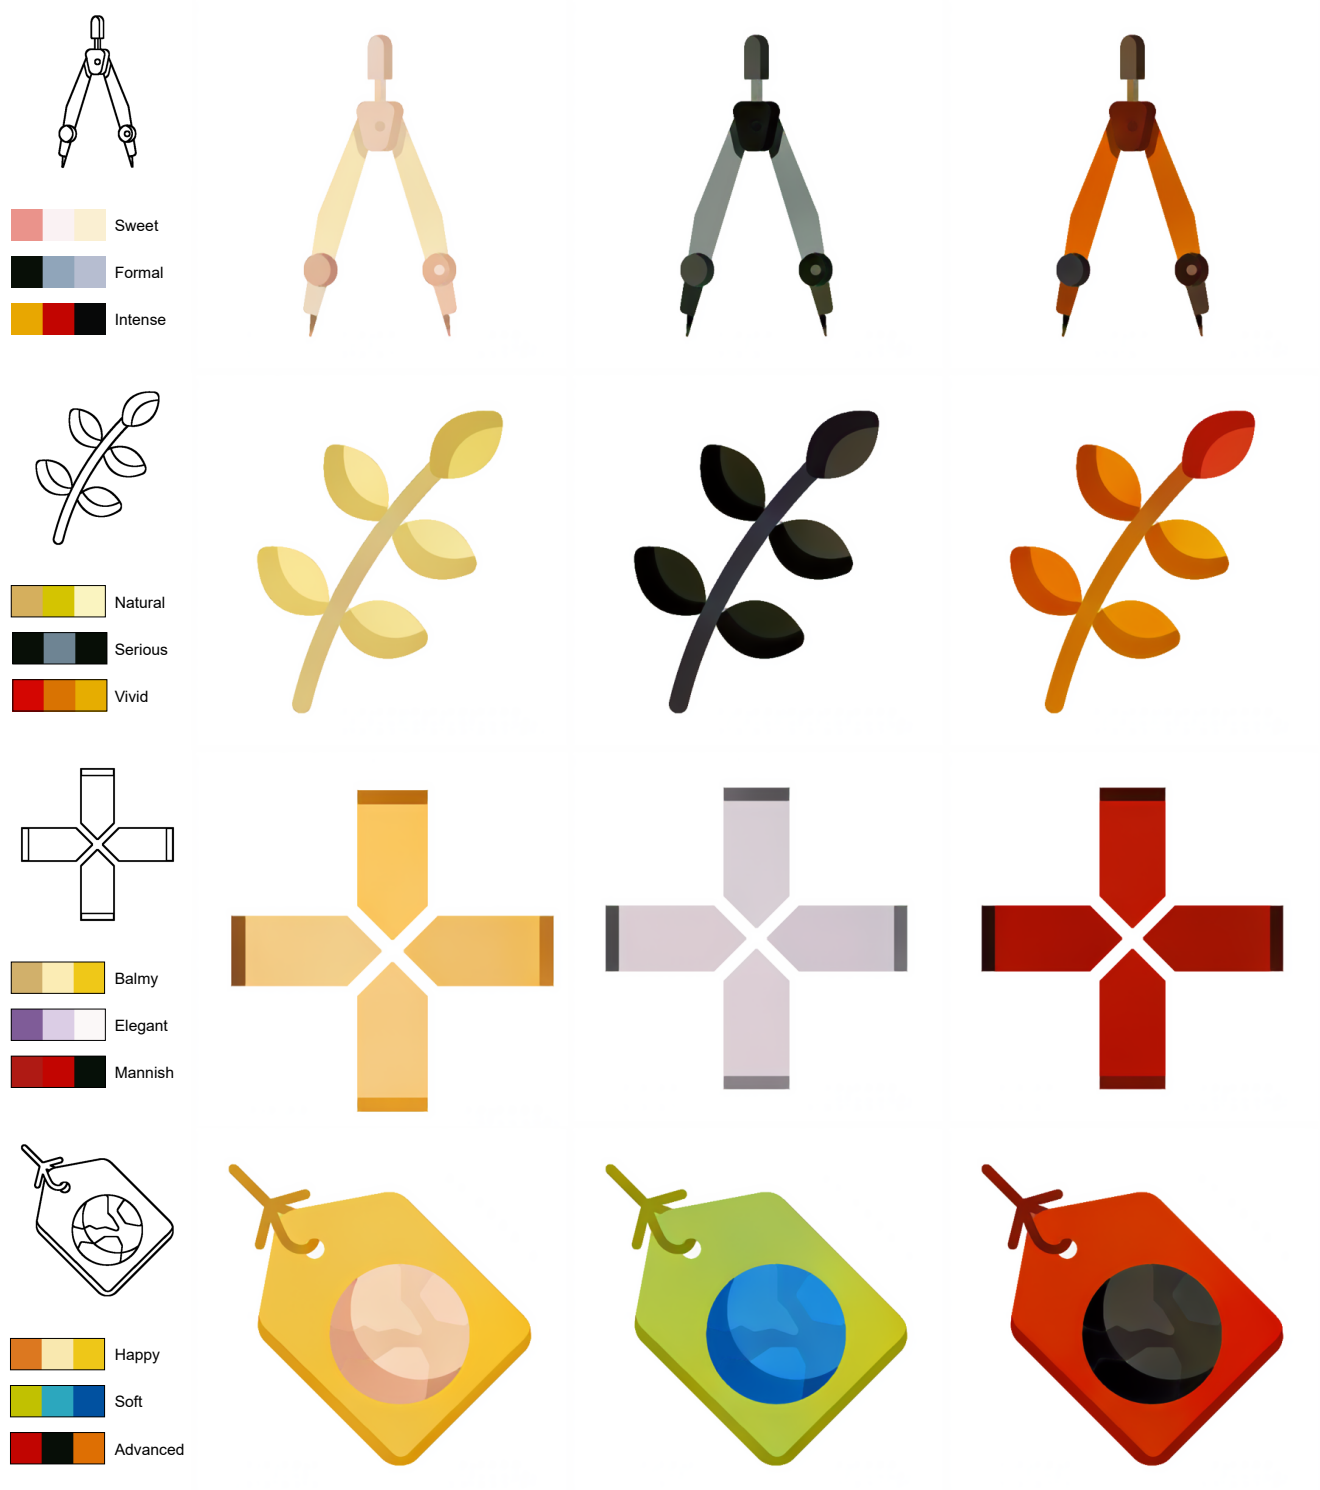

Figure 3. Our system can generates high-resolution flat-color icons based on the given sketch image and the colorization style. The resolution of these icons is  $512 \times 512$ .

| Sketch                                                                                | Style 1                                                                                           | Interpolation                                                                         |                                                                                       |                                                                                       |                                                                                       | Style 2                                                                                            | Interpolation                                                                        |                                                                                     |                                                                                     |                                                                                     | Style 1                                                                                        | Interpolation                                                                       |                                                                                     |                                                                                    |                                                                                     | Style 2                                                                                      |
|---------------------------------------------------------------------------------------|---------------------------------------------------------------------------------------------------|---------------------------------------------------------------------------------------|---------------------------------------------------------------------------------------|---------------------------------------------------------------------------------------|---------------------------------------------------------------------------------------|----------------------------------------------------------------------------------------------------|--------------------------------------------------------------------------------------|-------------------------------------------------------------------------------------|-------------------------------------------------------------------------------------|-------------------------------------------------------------------------------------|------------------------------------------------------------------------------------------------|-------------------------------------------------------------------------------------|-------------------------------------------------------------------------------------|------------------------------------------------------------------------------------|-------------------------------------------------------------------------------------|----------------------------------------------------------------------------------------------|
|    | Refined<br>    |    |    |    |    | Advanced<br>    |    |    |    |    | Relaxed<br>   |    |    |    |    | Elegant<br> |
|    | Active<br>     |    |    |    |    | Intimate<br>    |    |    |    |    | Youthful<br>  |    |    |    |    | Easy<br>    |
|    | Mysterious<br> |    |    |    |    | Traditional<br> |    |    |    |    | Sturdy<br>    |    |    |    |    | Sublime<br> |
|    | Pastel<br>     |    |    |    |    | Soft<br>        |    |    |    |    | Trusty<br>    |    |    |    |    | Plain<br>   |
|   | Girly<br>     |   |   |   |   | Warm<br>       |   |   |   |   | Tropical<br> |   |   |   |   | Bold<br>   |
|  | Graceful<br> |  |  |  |  | Naive<br>     |  |  |  |  | Robust<br>  |  |  |  |  | Solid<br> |

Figure 4. The colorization styles are interpolated.

|     | Anime | Comi | MUNIT | ASCFT | AdvIcon | Ours |
|-----|-------|------|-------|-------|---------|------|
| Q1  | 6     | 14   | 34    | 20    | 12      | 40   |
| Q2  | 13    | 8    | 6     | 14    | 16      | 69   |
| Q3  | 8     | 4    | 15    | 18    | 19      | 62   |
| Q4  | 5     | 12   | 12    | 6     | 3       | 88   |
| Q5  | 14    | 31   | 0     | 19    | 7       | 55   |
| Q6  | 2     | 9    | 18    | 5     | 42      | 50   |
| Q7  | 7     | 5    | 10    | 16    | 8       | 80   |
| Q8  | 7     | 24   | 13    | 14    | 14      | 54   |
| Q9  | 6     | 4    | 2     | 8     | 2       | 104  |
| Q10 | 12    | 10   | 14    | 1     | 15      | 74   |
| Q11 | 3     | 5    | 10    | 8     | 23      | 77   |
| Q12 | 11    | 28   | 6     | 4     | 13      | 64   |
| Q13 | 0     | 1    | 11    | 8     | 18      | 88   |

Table 1. The user study result obtained from 126 participants over 13 questions. The higher it is, the better.
